# Supplementary material
Source: PubMed Central journal article supplement (PMC156318)

Fig. 4

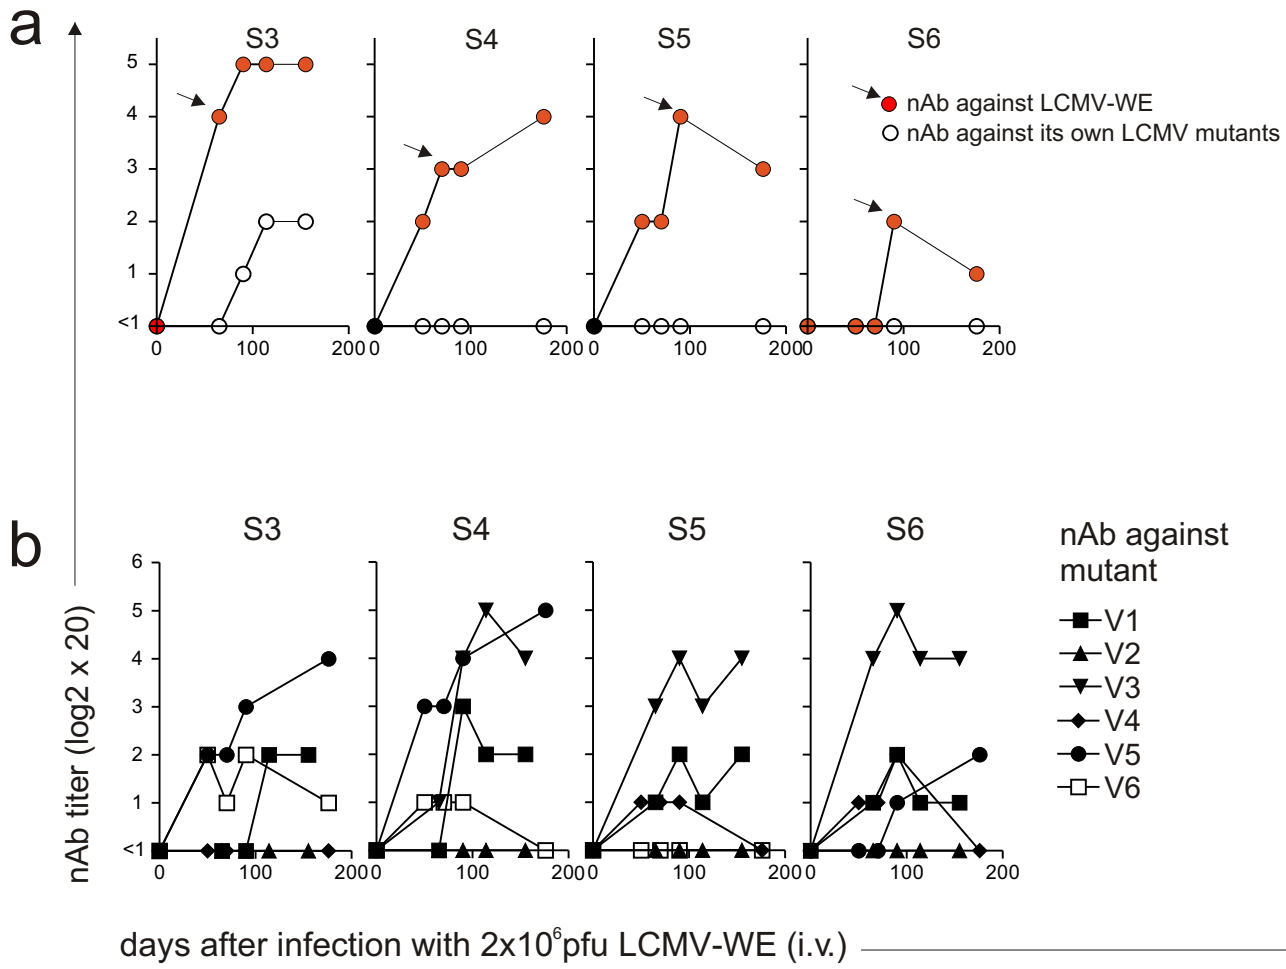

Supplement: pnas_1031671100_2.pdf [file pnas_1031671100_2.pdf]

Fig. 5

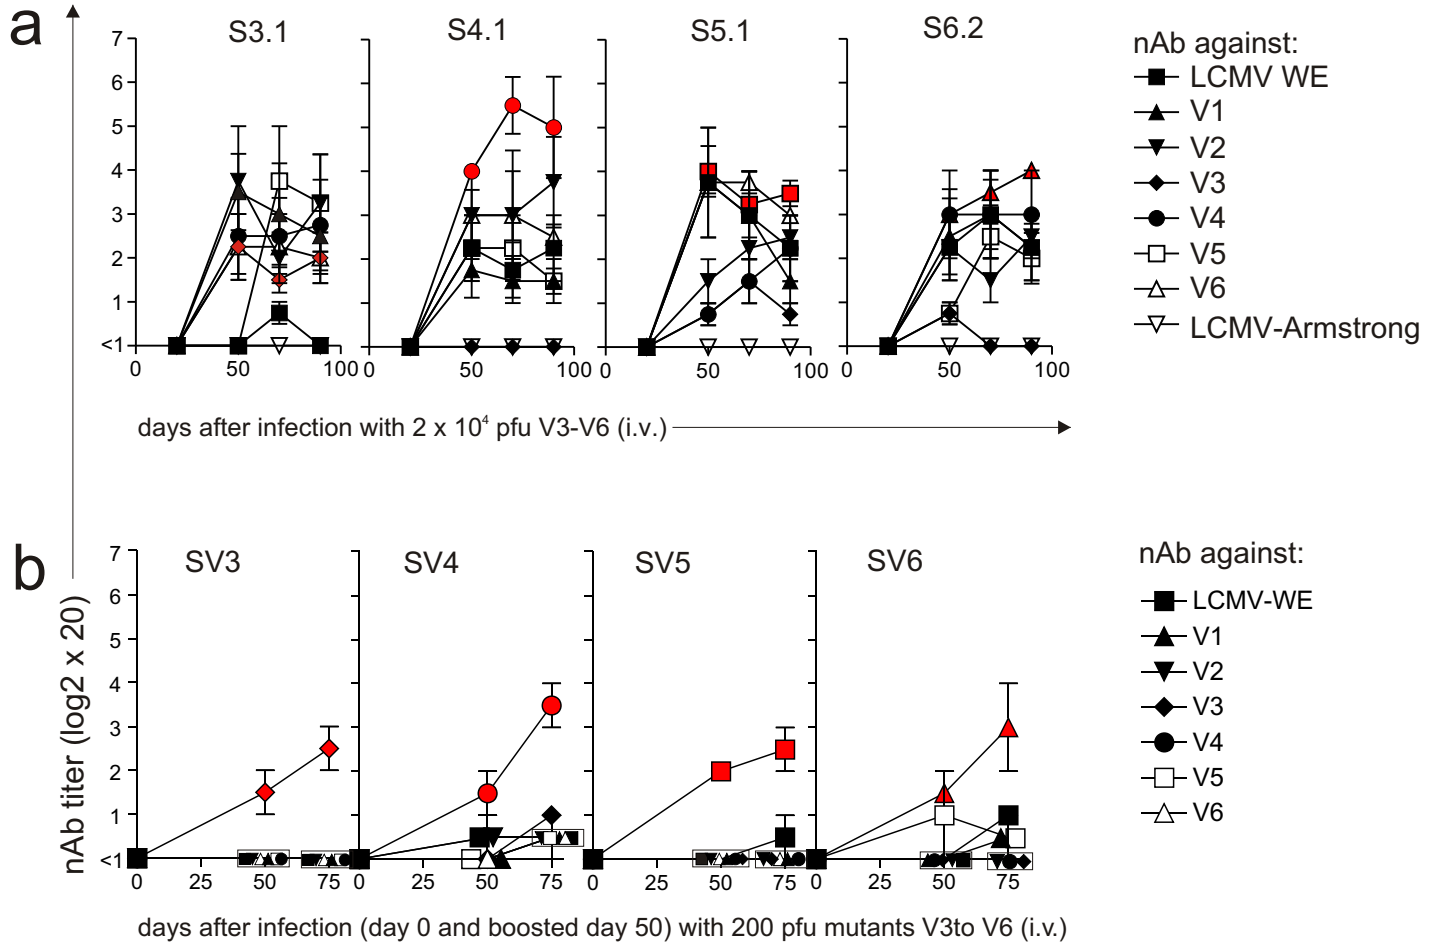

Supplement: pnas_1031671100_4.pdf [file pnas_1031671100_4.pdf]
